# Supplementary material for: A TetR-like regulator broadly affects the expressions of diverse genes in Mycobacterium smegmatis
Source: PubMed Central journal article supplement — Nucleic Acids Res. 2011 Oct 5;40(3):1009–20. doi: 10.1093/nar/gkr830 (PMC3273814; doi:10.1093/nar/gkr830), 2011-10-05
Supplement: supp_gkr830_nar-01730-h-2011-File007.pdf [file supp_gkr830_nar-01730-h-2011-File007.pdf]

## Supplemental Table S1 Primers used in this study

| Name      | Sequence 5'–3'                    | Enzyme         | Usage                |
|-----------|-----------------------------------|----------------|----------------------|
| Ms6564f   | GACGGAATTCCCATGACCACCGCTGAAGCG    | <i>EcoRI</i>   | Clone and expression |
| Ms6564r   | ATATCTAGATCAGGGGCGCAGGCCGGCCA     | <i>XbaI</i>    | Clone and expression |
| Ms3452f   | ATATGAATTCGATGGCCAACCCGACGCGC     | <i>EcoRI</i>   | Clone to pMV261      |
| Ms3452r   | GACGTCTAGATCATGTGTCTGGGCGCGTGT    | <i>XbaI</i>    | Clone to pMV261      |
| Ms2389f   | GCGCGAATTCATGAACAAAGCGGAGCTCAT    | <i>EcoRI</i>   | Clone to pMV261      |
| Ms2389r   | TAAGTCTAGATTACCTGCGGCCCTTCTTGG    | <i>XbaI</i>    | Clone to pMV261      |
| Ms6564UPf | AGTATTAATTAAGGCTCGACACCGACTGCATC  | <i>PacI</i>    | Knock out            |
| Ms6564UPr | AGTTACTAGTCGCAGGCCTTTACACGAAAA    | <i>SpeI</i>    | Knock out            |
| Ms6564DNf | AGTAAAGCTTGTTCAGCGCTGGGGCACGGCA   | <i>HindIII</i> | Knock out            |
| Ms6564DNr | AGTTGCTAGCGCGCTTCCCGGTGTTTCTCTC   | <i>NheI</i>    | Knock out            |
| Ms4232pLf | ATATCTAGAAGTCAGGACATCGGCCGGCCA    | <i>XbaI</i>    | Clone to pMV261      |
| Ms4232pLr | AGATGAATTCGCAACAGTACCCATCGGCGA    | <i>EcoRI</i>   | Clone to pMV261      |
| Ms4235pLf | ATAATCTAGACCACCTTTCACCGGGTTCG     | <i>XbaI</i>    | Clone to pMV261      |
| Ms4235pLr | AGACGAATTCGAAACACACCTCCGCAACGT    | <i>EcoRI</i>   | Clone to pMV261      |
| Ms6302pLf | ATATCTAGACCCTCCATGTGGTTCGTAGCG    | <i>XbaI</i>    | Clone to pMV261      |
| Ms6302pLr | GCGCTGAATTCCTTCCCATTTACCTCCT      | <i>EcoRI</i>   | Clone to pMV261      |
| Ms6806pLf | ATATCTAGAACCGGCGACCCGATCTGCCA     | <i>XbaI</i>    | Clone to pMV261      |
| Ms6806pLr | AGACGAATTCGGGACCATTGTTACAGAGT     | <i>EcoRI</i>   | Clone to pMV261      |
| Ms6564pLf | ATAGTCTAGAGGCGACATGACGTGCATGAG    | <i>XbaI</i>    | Clone to pMV261      |
| Ms6564pLr | CGCTGAATTCGCGAGGCCTTTACACGAAAA    | <i>EcoRI</i>   | Clone to pMV261      |
| Rv757pLf  | AATTTCTAGATGGCCATGTCAACCGCCGCG    | <i>XbaI</i>    | Clone to pMV261      |
| Rv757pLr  | CCGGGAATTCCTTGTTGAACGTTACCTTCA    | <i>EcoRI</i>   | Clone to pMV261      |
| LacZf     | ATCAAGCTTATGAGGATGAGGGAAGCAAG     | <i>HindIII</i> | Clone to pMV261      |
| LacZr     | ATGCGCTAGCTTATTTTGACACCAGACCA     | <i>NheI</i>    | Clone to pMV261      |
| Ms1003pf  | ATATGAATTCGGTCCCAGCGGTGCGACGAT    | <i>EcoRI</i>   | Clone and ChIP       |
| Ms1003pr  | GCGCTCTAGAGTCGAGGTCTTTCAGATGGA    | <i>XbaI</i>    | Clone and ChIP       |
| Ms1015pf  | ATATATGAATTCGGTCTCGTTCGTGCGCCACA  | <i>EcoRI</i>   | Clone and ChIP       |
| Ms1015pr  | GCGCGCTCTAGACTGTGAATTTCTGTGAATCC  | <i>XbaI</i>    | Clone and ChIP       |
| Ms1432pf  | AGATGAATTCCTTCGGGCGGAACCAGTCGG    | <i>EcoRI</i>   | Clone and ChIP       |
| Ms1432pr  | ATATCTAGAGCGCTGAGCCTACTGGGCCG     | <i>XbaI</i>    | Clone and ChIP       |
| Ms1930pf  | ATATGAATTCGGGCGCCATGCTGGCCATGT    | <i>EcoRI</i>   | Clone and ChIP       |
| Ms1930pr  | GCGCTCTAGAATGCGGAGGAGATAGCCTTT    | <i>XbaI</i>    | Clone and ChIP       |
| Ms2294pf  | ATATATGAATTCGGTCTCGTTCGTGCGCCACA  | <i>EcoRI</i>   | Clone and ChIP       |
| Ms2294pr  | GCGCGCTCTAGACTGTGAATTTCTGTGAATCC  | <i>XbaI</i>    | Clone and ChIP       |
| Ms2312pf  | ATATATCTCGAGCGCACCCGGCCGGCAGCAACG | <i>XhoI</i>    | Clone and ChIP       |
| Ms2312pr  | ATCTATTCTAGACGTCCGCCGGCGACCTCGCG  | <i>XbaI</i>    | Clone and ChIP       |
| Ms2389pf  | ATATATCTCGAGATCTTCCGGGGGAACGCGGG  | <i>XhoI</i>    | Clone and ChIP       |
| Ms2389pr  | GCGCGCTCTAGACCAAAACCTCCGAAACCAGT  | <i>XbaI</i>    | Clone and ChIP       |
| Ms2402pf  | ATATGAATTCCTGTTACCCGGCCGGATC      | <i>EcoRI</i>   | Clone and ChIP       |
| Ms2402pr  | AGATTCTAGACGGACCTCCAAGTTCACGCC    | <i>XbaI</i>    | Clone and ChIP       |
| Ms2417pf  | ATATGAATTCAGACCGCATGGTTCGCCGAG    | <i>EcoRI</i>   | Clone and ChIP       |
| Ms2417pr  | AGATTCTAGAACCGCAATCCTACGGCGACG    | <i>XbaI</i>    | Clone and ChIP       |

continued

|          |                                  |              |                |
|----------|----------------------------------|--------------|----------------|
| Ms2723pf | ATATGAATTCGTCGGCGCTGCCGCACGGGC   | <i>EcoRI</i> | Clone and ChIP |
| Ms2723pr | GCGCTCTAGAGGTGGTGCCTCTCCGAGTAG   | <i>XbaI</i>  | Clone and ChIP |
| Ms2943pf | AGATGAATTCGGCTCGATGACGAATGTGG    | <i>EcoRI</i> | Clone and ChIP |
| Ms2943pr | AGATTCTAGAGCGAACCCCTTCGTCAGAAC   | <i>XbaI</i>  | Clone and ChIP |
| Ms3172pf | ATATACTCGAGGGAAGTCGACCGGCCTGGAG  | <i>XhoI</i>  | Clone and ChIP |
| Ms3172pr | GCGCGTCTAGAACCTGCAGATGCTAAAGGGC  | <i>XbaI</i>  | Clone and ChIP |
| Ms3673pf | ATATGAATTCACCGTGAGGGTGACCCCGAC   | <i>EcoRI</i> | Clone and ChIP |
| Ms3673pr | AGATTCTAGAGGCGTCAATCTTGGGGTGCC   | <i>XbaI</i>  | Clone and ChIP |
| Ms3984pf | AGACGAATTCACGACATCGGCACCAAGGTC   | <i>EcoRI</i> | Clone and ChIP |
| Ms3984pr | ATATCTAGACGCATCGCCTCCTTGGCTCG    | <i>XbaI</i>  | Clone and ChIP |
| Ms4072pf | ATATGAATTCGCGGTCGGTTGAGCTCCGAC   | <i>EcoRI</i> | Clone and ChIP |
| Ms4072pr | GCGCTCTAGATGTGGATGACGGAATACACC   | <i>XbaI</i>  | Clone and ChIP |
| Ms4084pf | AGACGAATTCGACGAGATTCAAGGCCATC    | <i>EcoRI</i> | Clone and ChIP |
| Ms4084pr | GACGTCTAGAGTCGTCAGTGATATCCCTGA   | <i>XbaI</i>  | Clone and ChIP |
| Ms4307pf | ATATGAATTCGCGGAGCCCCAGCGAGGTC    | <i>EcoRI</i> | Clone and ChIP |
| Ms4307pr | AGACTCTAGACTCAGCACCTCCGTCACGGC   | <i>XbaI</i>  | Clone and ChIP |
| Ms4674pf | ATATGAATTCCTCAGCTCGACCTCGTCCCAG  | <i>EcoRI</i> | Clone and ChIP |
| Ms4674pr | GCGCTCTAGACTTGTGCTCCTTGAATGCTT   | <i>XbaI</i>  | Clone and ChIP |
| Ms4925pf | ATATGAATTCGCGGTCGAGGTGGTCGAA     | <i>EcoRI</i> | Clone and ChIP |
| Ms4925pr | ATATCTAGACGAAGTGGTGCCGCTGTGGC    | <i>XbaI</i>  | Clone and ChIP |
| Ms5082pf | ATATGAATTCGCAGGCCGCTCAAGGTCAGC   | <i>EcoRI</i> | Clone and ChIP |
| Ms5082pr | AGACTCTAGAGCTTCCGATACTGCCTCACG   | <i>XbaI</i>  | Clone and ChIP |
| Ms5253pf | ATATGAATTCGACACCGAGGAGCACCGA     | <i>EcoRI</i> | Clone and ChIP |
| Ms5253pr | GCGCTCTAGATCGTTTCTCCTTATCTGGTG   | <i>XbaI</i>  | Clone and ChIP |
| Ms5399pf | AGATCTCGAGATCAACGTCATGGCCATCTC   | <i>XhoI</i>  | Clone and ChIP |
| Ms5399pr | ATATCTAGAGGGTGGTGGCTACCCGGACC    | <i>XbaI</i>  | Clone and ChIP |
| Ms5402pf | AGATGAATTCGACAGCCTCGGGCACCATCG   | <i>EcoRI</i> | Clone and ChIP |
| Ms5402pr | ATATCTAGAGGGTGGTGGCTACCCGGACC    | <i>XbaI</i>  | Clone and ChIP |
| Ms5451pf | GCGCGAATTCAACCCATTTTACCTGAAG     | <i>EcoRI</i> | Clone and ChIP |
| Ms5451pr | ATATCTAGAGCGCGCGAGTGTATCGCACA    | <i>XbaI</i>  | Clone and ChIP |
| Ms6157pf | ATATGAATTCGGAGATCGCCCGCACCGAGG   | <i>EcoRI</i> | Clone and ChIP |
| Ms6157pr | GACGTCTAGACTGTGCCTACGCTCCACTTC   | <i>XbaI</i>  | Clone and ChIP |
| Ms6302pf | ATATATGAATTCGCGCATCCGCGAGGGCGGT  | <i>EcoRI</i> | Clone and ChIP |
| Ms6302pr | GCGCGCTCTAGACCTTCCCATTCTTACCTCCT | <i>XbaI</i>  | Clone and ChIP |
| Ms6304pf | ATATATGAATTCGCCAGCGCCTCGCGGCGCAC | <i>EcoRI</i> | Clone and ChIP |
| Ms6304pr | GCGCGCTCTAGACCGATGACATCCCACGTTC  | <i>XbaI</i>  | Clone and ChIP |
| Ms6443pf | ATATCTCGAGCGTCAAGGAAGCGGTGCTG    | <i>XhoI</i>  | Clone and ChIP |
| Ms6443pr | GACGTCTAGAATGTTTCGATCGAGGGGCGA   | <i>XbaI</i>  | Clone and ChIP |
| Ms6600pf | ATATCTCGAGCTGCACCGCGGTATCGCCGA   | <i>XhoI</i>  | Clone and ChIP |
| Ms6600pr | GCGCTCTAGAGAAGACCTCCGAGATCGGTG   | <i>XbaI</i>  | Clone and ChIP |
| Ms6806pf | AGACGAATTCACCAAGGGCGCCATCTACAA   | <i>EcoRI</i> | Clone and ChIP |
| Ms6806pr | AGACTCTAGACGGGACCATTGTTACGAGT    | <i>XbaI</i>  | Clone and ChIP |

Notes: Restriction enzyme sites are underlined.

**Supplemental Table S2 DNA substrate fragment used in this study**

| Name    | Length and Source | Sequence or primers used to amplify long segments 5'–3'                    |
|---------|-------------------|----------------------------------------------------------------------------|
| Ms1003p | 500bp, PCR        | f: ATATGAATTCGGTCCCAGCGGTGCGACGAT<br>r: GCGCTCTAGAGTCGAGGTCTTTCAGATGGA     |
| Ms1015p | 500bp, PCR        | f: ATATATGAATTCGGTCTCGTTCGTGCGCCACA<br>r: GCGCGCTCTAGACTGTGAATTTCTGTGAATCC |
| Ms1536p | 500bp, PCR        | f: ATATGAATTCCC GCGGCCATCCCCACCGCA<br>r: GCGCTCTAGACAACGTTTGGACGCACGCGA    |
| Ms1854p | 500bp, PCR        | f: ATATGAATTCAGATGGCACGGCGGCGTTGC<br>r: AGATTCTAGACCCCTCGATCTGTGGCGATC     |
| Ms2089p | 500bp, PCR        | f: ATATGAATTCTGCGCACGTCCACGGTGGTG<br>r: ATATTCTAGACACGGCACGCCAGTGTAGCG     |
| Ms2294p | 500bp, PCR        | f: ATATATGAATTCGGTCTCGTTCGTGCGCCACA<br>r: GCGCGCTCTAGACTGTGAATTTCTGTGAATCC |
| Ms2389p | 500bp, PCR        | f: ATATATCTCGAGATCTTCCGGGGGAACGCGGG<br>r: GCGCGCTCTAGACCAAAACCTCCGAAACCAGT |
| Ms2402p | 500bp, PCR        | f: ATATGAATTCCCCTGTTACCCGGCCGGATC<br>r: AGATTCTAGACGGACCTCCAAGTTCACGCC     |
| Ms2423p | 500bp, PCR        | f: AGATGAATTCGGTCTACCCGCACCTTGAGG<br>r: ATATTCTAGAGACGCCTTACCCTACCGCCG     |
| Ms2619p | 500bp, PCR        | f: ATATGAATTCAGGGCGGCGATCCGTTTCGTG<br>r: GACGTCTAGAAACCGGTACCTTACCGGAA     |
| Ms4232p | 500bp, PCR        | f: ATATGAATTCCAAGTCCACCATCGCGCCTG<br>r: AGATTCTAGAGCAACAGTACCCATCGGCGA     |
| Ms4925p | 500bp, PCR        | f: ATATGAATTCCC GCGTCGAGGTGGTTCGAA<br>r: ATATTCTAGACGAAGTGGTGCCGCTGTGGC    |
| Ms5083p | 500bp, PCR        | f: ATATGAATTCGCAGGCCGCTCAAGGTCAGC<br>r: AGACTCTAGAGCTTCCGATACTGCCTCACG     |
| Ms5402p | 500bp, PCR        | f: AGATGAATTCGACAGCCTCGGGCACCATCG<br>r: ATATTCTAGAGGGTGGTGGCTACCCGGACC     |
| Ms6157p | 500bp, PCR        | f: ATATGAATTCGGAGATCGCCCGCACCGAGG<br>r: GACGTCTAGACTGTGCCTACGCTCCACTTC     |
| Ms6201p | 500bp, PCR        | f: ATATGAATTCACGGCAGCGGCCTGCGACA<br>r: GACGTCTAGAACTTGCGAGAAGGCAGCACC      |
| Ms6302p | 500bp, PCR        | f: ATATATGAATTCCC GGCATCCGCGAGGGCGGT<br>r: GCGCGCTCTAGACCTTCCCATTCTTACCTCT |
| Ms6304p | 500bp, PCR        | f: ATATATGAATTCGCCAGCGCCTCGCGGCGCAC<br>r: GCGCGCTCTAGACCGATGACATTCACGTTTC  |
| Ms6443p | 500bp, PCR        | f: ATATCTCGAGCGTCGAAGGAAGCGGTGCTG<br>r: GACGTCTAGAATGTTTCGCATCGAGGGGCGA    |
| Ms6806p | 500bp, PCR        | f: AGACGAATTCACCAAGGGCGCCATCTACAA<br>r: AGACTCTAGACGGGACCATTGTTACGAGT      |

continued

|            |                            |                                                                                                                                                               |
|------------|----------------------------|---------------------------------------------------------------------------------------------------------------------------------------------------------------|
| Ms6821p    | 500bp, PCR                 | f: ATATATGAATTCCATGCGCGCGTTCGAGTCCGG<br>r: GCGCGCTCTAGAACGGATTGTCACGATCCTTT                                                                                   |
| Ms6464p1   | 132bp, PCR                 | f: CTCTGTGGCCGGTCCACTTT<br>r: CACGAACGTCGACGGCCTGA                                                                                                            |
| Ms6464p2   | 136bp, PCR                 | f: TTCGTGCGCCACAGCGGCGT<br>r: GTGTGGACGTCCGTCACGGC                                                                                                            |
| Ms6464p3   | 135bp, PCR                 | f: GGACGTCCACACGGTCGATC<br>r: TGATCGGGGCCAGCGGATTT                                                                                                            |
| Ms6464p4   | 134bp, PCR                 | f: TTAAATCCGCTGGCCCCGAT<br>r: CGCAGGCCTTTACACGAAAA                                                                                                            |
| Ms6464p4-1 | 189bp, PCR                 | f: TTAAATCCGCTGGCCCCGAT labeled with FITC<br>r: ATGGCCACCCGCGACTTCTC                                                                                          |
| Ms6464p4-2 | 187bp, PCR                 | f: TTAAATCCGCTGGCCCCGAT<br>r: ATGGCCACCCGCGACTTCTC labeled with FITC                                                                                          |
| Ms6464p5   | 60bp, synthesized directly | <b>5'-AAATCCGCTGGCCCCGATCACCAGTTTCGTGCTGTCA<br/>TAGGCCCTTGCCTCGTGTCT-3'</b><br><b>3'-AGGACACGAGCGCAAGGGCCTATGACAGCGACGAAACTG<br/>GTGATCGGGGCCAGCGGATTT-5'</b> |
| Ms6464p6   | 39bp, synthesized directly | <b>5'-CGGGTCATAAACGAGACGGTACGTCTCGTCTTGTGGCA<br/>G-3'</b><br><b>3'-CTGCCACAAGACGAGACGTACCGTCTCGTTTATGACCCG-5'</b>                                             |
| Ms6464p7   | 45bp, synthesized directly | <b>5'-CTTGTGGCAGAGTACGGGGTGTCACTTTTCGTGTAAAG<br/>GCCTGCG-3'</b><br><b>3'-CGCAGGCCTTTACACGAAAAGTGACACCCCGTACTCTGCC<br/>ACAAG-5'</b>                            |
| Ms6564p8   | 39bp, synthesized directly | <b>5'-CGGGTCATAACTTGACTAGTATTCAGTGCCTTGTGGCA<br/>G-3'</b><br><b>3'-CTGCCACAAGGCACTGAATACTAGTCAAGTTATGACCCG-5'</b>                                             |

### Supplemental Table S3 Primers for qRT-PCR

| Name       | Sequence 5'-3'        | Enzyme | Usage                      |
|------------|-----------------------|--------|----------------------------|
| RT-MS1003f | AACACTGCCAACAACGCCGT  |        | Reverse transcription -PCR |
| RT-MS1003r | AGAACCCGTCCATGGCAACA  |        | Reverse transcription -PCR |
| RT-MS1014f | GAACAGGTCATGGGACTGCT  |        | Reverse transcription -PCR |
| RT-MS1014r | CGCTGCTTGTGTCACTGAT   |        | Reverse transcription -PCR |
| RT-MS1536f | ACACAACTGCACGACGTGAT  |        | Reverse transcription -PCR |
| RT-MS1536r | GAACACGTCACCGTAGGGAT  |        | Reverse transcription -PCR |
| RT-MS2089f | CGACGATGTCTCGTTGAAGA  |        | Reverse transcription -PCR |
| RT-MS2089r | GACATGGAACCTCGACACCC  |        | Reverse transcription -PCR |
| RT-MS2294f | GAACAGGTCATGGGACTGCT  |        | Reverse transcription -PCR |
| RT-MS2294r | CGCTGCTTGTGTCACTGAT   |        | Reverse transcription -PCR |
| RT-MS2389f | GTTCGGTGTCTTCGAGCAG   |        | Reverse transcription -PCR |
| RT-MS2389r | CCAGAGATAACCGCCTTGAA  |        | Reverse transcription -PCR |
| RT-MS2419f | AATTGACCGAGATGGTCACG  |        | Reverse transcription -PCR |
| RT-MS2419r | GTCCAGCAGTTGACGTTTGA  |        | Reverse transcription -PCR |
| RT-MS2423f | GCAAGAAGATCAAACGCCTC  |        | Reverse transcription -PCR |
| RT-MS2423r | TCCATGACGTAGAACGGTGA  |        | Reverse transcription -PCR |
| RT-MS3172f | GTGGTACCCGTCCTCGAAC   |        | Reverse transcription -PCR |
| RT-MS3172r | TCTTGGCGATCTGTTTACCC  |        | Reverse transcription -PCR |
| RT-MS4222f | ACTACCTCGCGGTCATCAAG  |        | Reverse transcription -PCR |
| RT-MS4222r | AGACCACGGGTGGAGTCAC   |        | Reverse transcription -PCR |
| RT-MS4225f | GATCCGACGAAATCCGTTC   |        | Reverse transcription -PCR |
| RT-MS4225r | GGGTGAAGTAGAGCAGCAGG  |        | Reverse transcription -PCR |
| RT-MS4226f | CGGGTGTTCGACGACTATG   |        | Reverse transcription -PCR |
| RT-MS4226r | CGCTGTGCGTGAGTACAAGT  |        | Reverse transcription -PCR |
| RT-MS4227f | GGACAACAACCACAGCGAC   |        | Reverse transcription -PCR |
| RT-MS4227r | GGGTGATCAGTTCCAGGTCA  |        | Reverse transcription -PCR |
| RT-MS4228f | CGCACAACGACTTCATCTTC  |        | Reverse transcription -PCR |
| RT-MS4228r | CGACGTTGATGAACATCTGG  |        | Reverse transcription -PCR |
| RT-MS4229f | TCGATGAGCTGGTACGTCAG  |        | Reverse transcription -PCR |
| RT-MS4229r | ACTCATTTGTCCCAAGCACC  |        | Reverse transcription -PCR |
| RT-MS4232f | AGATCGTCGAGATCGGTGAC  |        | Reverse transcription -PCR |
| RT-MS4232r | CATGAACTTCGGTCCCTTGT  |        | Reverse transcription -PCR |
| RT-MS4233f | CGAGACCTTCGTCTACCTCG  |        | Reverse transcription -PCR |
| RT-MS4233r | GTA CTGGCGCAGATCCTGTC |        | Reverse transcription -PCR |
| RT-MS4925f | GAGGATTTGACCGCTGTTA   |        | Reverse transcription -PCR |
| RT-MS4925r | CAACTGGGCCTGCAGTAGAT  |        | Reverse transcription -PCR |
| RT-MS5082f | ATGGCCAAGGAACTCAAGC   |        | Reverse transcription -PCR |
| RT-MS5082r | CAGATCTTGACCATGTCCGA  |        | Reverse transcription -PCR |
| RT-MS6157f | GTCGAGCAGAAGCCCTACAC  |        | Reverse transcription -PCR |
| RT-MS6157r | CGGTACGCATGTAGGTGATG  |        | Reverse transcription -PCR |
| RT-MS6201f | TCGACCATCGAACAGCAGTA  |        | Reverse transcription -PCR |
| RT-MS6201r | TTGGTGAACGTCTTGTCGAG  |        | Reverse transcription -PCR |

continued

---

|            |                        |                            |
|------------|------------------------|----------------------------|
| RT-MS6301f | GGTGGGTTATCCCAAGACCT   | Reverse transcription -PCR |
| RT-MS6301r | TGTAGTCGATGAACAACCGC   | Reverse transcription -PCR |
| RT-MS6302f | AAGGATCGCATCAAAGTCTGCT | Reverse transcription -PCR |
| RT-MS6302r | TTCCCTCCATCTGGTCGTAG   | Reverse transcription -PCR |
| RT-MS6304f | GTATGAACCCAAGTGGGACG   | Reverse transcription -PCR |
| RT-MS6304r | CTCGAAGTCGAGGTGGTTGT   | Reverse transcription -PCR |
| RT-MS6443f | GACCTCGACTCGTTCTACGC   | Reverse transcription -PCR |
| RT-MS6443r | GTAGGCCTTGGCCTCGTAAC   | Reverse transcription -PCR |
| RT-MS6806f | CGACATCCTCATCACACTGG   | Reverse transcription -PCR |
| RT-MS6806r | GGAGAACGTGCCGTTGTAGT   | Reverse transcription -PCR |
| RT-MS6900f | GGTTCGTCGTTCAAGGTGTT   | Reverse transcription -PCR |
| RT-MS6900r | GAGCATGAGCCGGTAGTAGC   | Reverse transcription -PCR |

---

## Supplemental Table S4 Strains and plasmids used in this study

| Strain or plasmid                | Relevant genotype or features                       | Source or reference |
|----------------------------------|-----------------------------------------------------|---------------------|
| <b>Strains</b>                   |                                                     |                     |
| E.coli                           |                                                     |                     |
| DH5a                             | Host for plasmid construction                       | TaKaRa              |
| BL21                             | Host for overexpression                             | TaKaRa              |
| XR                               | Host for bacteria one-hybrid()                      | Stratagene          |
| M. smegmatis mc <sup>2</sup> 155 |                                                     |                     |
| Msm/WT                           | M. smegmatis mc2155                                 | 5                   |
| Msm/pMV261                       | mc <sup>2</sup> 155with pMV261                      | This study          |
| Msm/pMV261-Ms6564                | mc <sup>2</sup> 155with pMV261::6564                | This study          |
| Msm/pMV261-Ms3452                | mc <sup>2</sup> 155with pMV261::3452                | This study          |
| Msm/Ms6564::hyg                  | mc <sup>2</sup> 155 Ms6564 replaced by hyg          | This study          |
| Ms6564 complementation           | mc <sup>2</sup> 155with pMind::6564                 | This study          |
| △Y0                              | Msm/Ms6564::hyg with pMV261::LacZ                   | This study          |
| △Y1                              | Msm/Ms6564::hyg with pMV::4232P::LacZ               | This study          |
| △Y2                              | Msm/Ms6564::hyg with pMV::4235P::LacZ               | This study          |
| △Y3                              | Msm/Ms6564::hyg with pMV::6806P::LacZ               | This study          |
| △Y4                              | Msm/Ms6564::hyg with pMV::6564P::LacZ               | This study          |
| △Y5                              | Msm/Ms6564::hyg with pMV::757P::LacZ                | This study          |
| △Y6                              | Msm/Ms6564::hyg with pMV::GroEL1P::LacZ             | This study          |
| Y0                               | mc <sup>2</sup> 155with pMV261::LacZ                | This study          |
| Y1                               | mc <sup>2</sup> 155with pMV::4232P::LacZ            | This study          |
| Y2                               | mc <sup>2</sup> 155with pMV::4235P::LacZ            | This study          |
| Y3                               | mc <sup>2</sup> 155with pMV::6806P::LacZ            | This study          |
| Y4                               | mc <sup>2</sup> 155with pMV::6564P::LacZ            | This study          |
| Y5                               | mc <sup>2</sup> 155with pMV::757P::LacZ             | This study          |
| Y6                               | mc <sup>2</sup> 155with pMV::GroEL1P::LacZ          | This study          |
| <b>Plasmids</b>                  |                                                     |                     |
| pMV261                           | Kan <sup>r</sup> , pAL5000 replicon                 | 27                  |
| pMV261::6564                     | Ms6564 in EcoRI-XbaI site of pMV261                 | This study          |
| pMV261::3452                     | Ms3452 in EcoRI-XbaI site of pMV261                 | This study          |
| pMV261::2389                     | Ms2389 in EcoRI-XbaI site of pMV261                 | This study          |
| pMV261:: LacZ                    | LacZ in HindIII-NheI site of pMV261                 | This study          |
| pMV261::4232P::LacZ              | Ms4232P in EcoRI-HindIII site of pMV261:: LacZ      | This study          |
| pMV261::4235P::LacZ              | Ms4235P in EcoRI-HindIII site of pMV261:: LacZ      | This study          |
| pMV261::6806P::LacZ              | Ms6806P in EcoRI-HindIII site of pMV261:: LacZ      | This study          |
| pMV261::6564P::LacZ              | Ms6564P in EcoRI-HindIII site of pMV261:: LacZ      | This study          |
| pMV261::757P::LacZ               | Rv757P in EcoRI-HindIII site of pMV261:: LacZ       | This study          |
| pMV261::GroEL1P::LacZ            | GroEL1P in EcoRI-HindIII site of pMV261:: LacZ      | This study          |
| pMind                            | Kan <sup>r</sup> , pAL5000 replicon                 | 26                  |
| pMind::6564                      | Ms6564 in BamHI-PacI site of pMind                  | This study          |
| pBXcmT                           | chlo <sup>r</sup> , p15A replicon, lac-UV5 promoter | 2                   |
| p6902                            | Ms6902p in XbaI sites of pBXcmT                     | This study          |

continued

---

|           |                                                                 |            |
|-----------|-----------------------------------------------------------------|------------|
| P6564     | Ms6564p in XbaI sites of pBXcmT                                 | This study |
| P2312     | Ms2312p in XbaI sites of pBXcmT                                 | This study |
| P4925     | Ms4925p in XbaI sites of pBXcmT                                 | This study |
| pTRG      | tet <sup>r</sup> , ColE1 replicon, lpp/lac-UV5 promoter         | Stratagene |
| pTRG-6564 | Ms6564 in EcoRI-XbaI sites of pTRG                              | This study |
| pTRG-0349 | Ms0349 in EcoRI-XbaI sites of pTRG                              | This study |
| pET28a(+) | Kan <sup>r</sup> , T7 lac promoter, N-terminal His <sub>6</sub> | Novagen    |
| pET-6564  | Ms6564 in EcoRI-XbaI sites of pET28a                            | This study |

---



## Supplemental Fig. S1

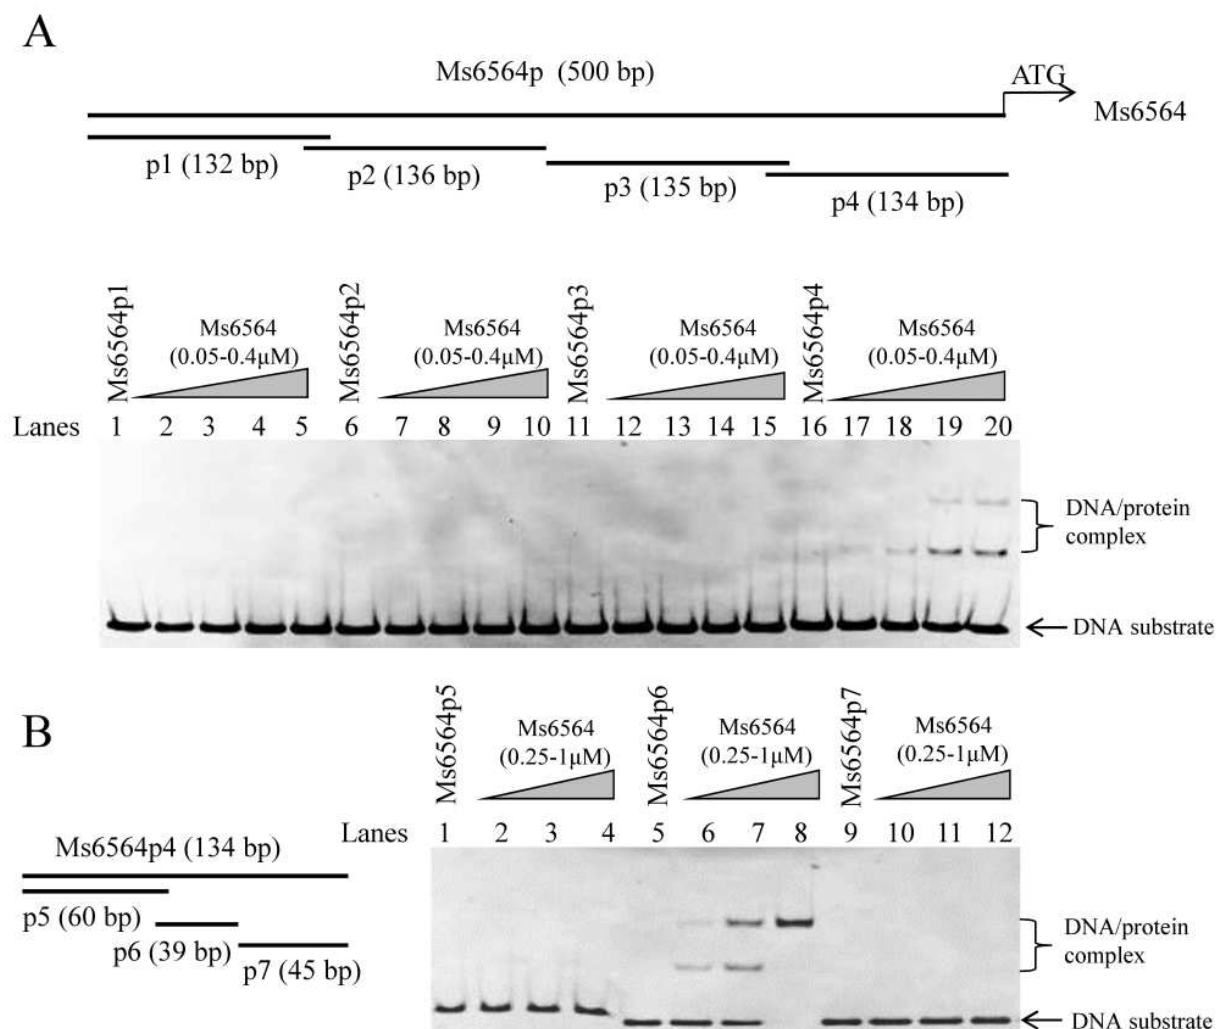

**Fig. S1 EMSA assays for mapping the DNA-binding region within the Ms6564 promoter by Ms6564 protein. (A)** Several short duplex DNA substrates derived from the Ms6564 promoter DNA, designated as p1, p2, p3, and p4, were synthesized and labeled. Each of these different DNA substrates was co-incubated with 0.05-0.4 $\mu$ M Ms6564 protein. **(B)** Several further truncated DNA substrates, p5, p6, and p7, covering different regions of Ms6564p4 were synthesized. Each of the DNA substrates was co-incubated with 0.25 - 1  $\mu$ M Ms6564 protein. The free DNA substrate and DNA/protein complex are indicated.



### Supplemental Fig. S3

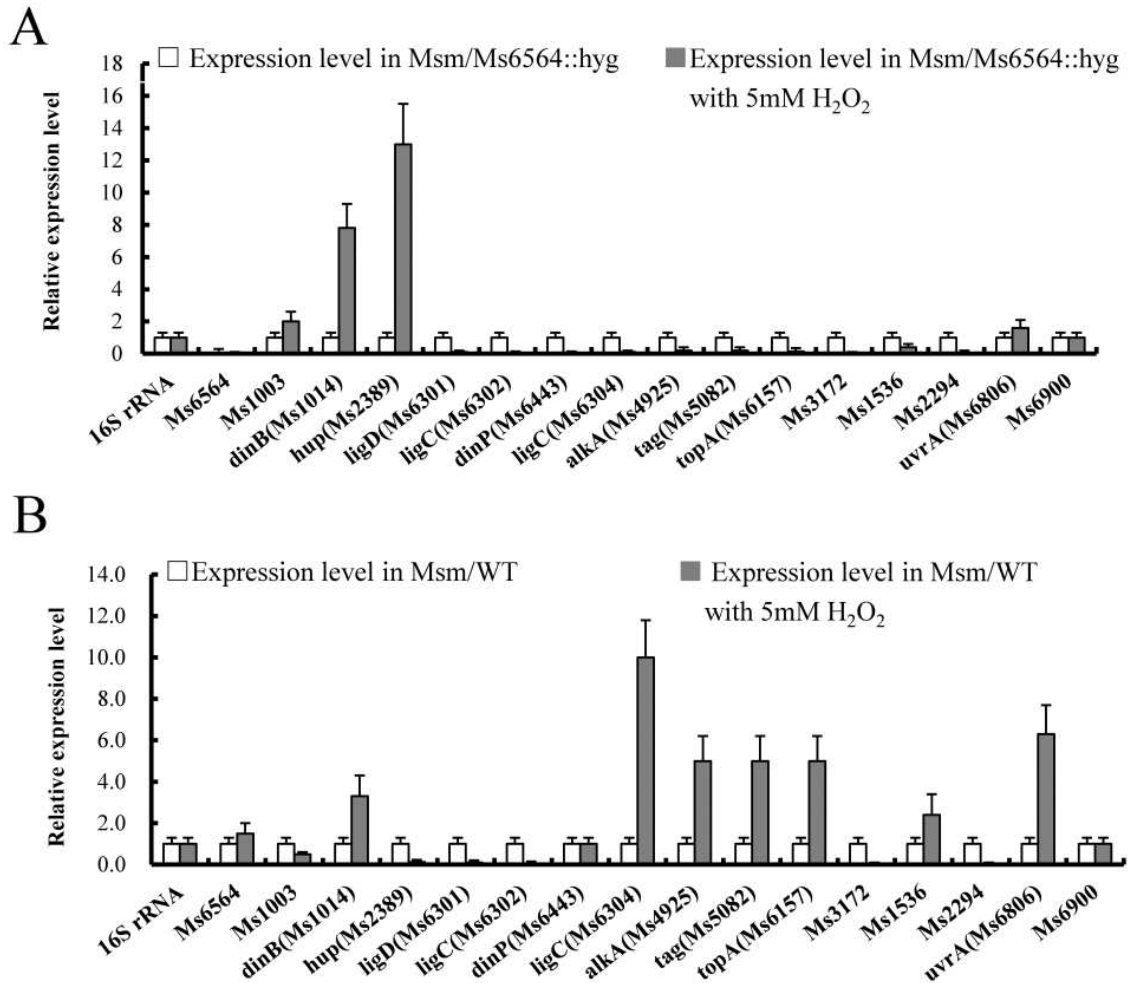

**Fig. S3 Expression assays of DNA damage and repair genes in wild-type and Ms6564-deleted mutant strains after induction by 5 mM H<sub>2</sub>O<sub>2</sub>.** qRT-PCR assay for the relative expression levels of DNA damage and repair genes in  $\Delta$ Ms6564 *M. smegmatis* strains (A) and in wildtype strains (B) before and after induction by 5 mM H<sub>2</sub>O<sub>2</sub> for 3 h. The mycobacterial cDNA was amplified as described in “Materials and Methods”. The relative expression levels of the genes were normalized using 16S rRNA gene as an invariant transcript, and an unrelated promoter gene Ms6900 was used as negative control. Data were analyzed using the  $2^{-\Delta\Delta C_t}$  method as described previously (30).

### Supplemental Fig. S4

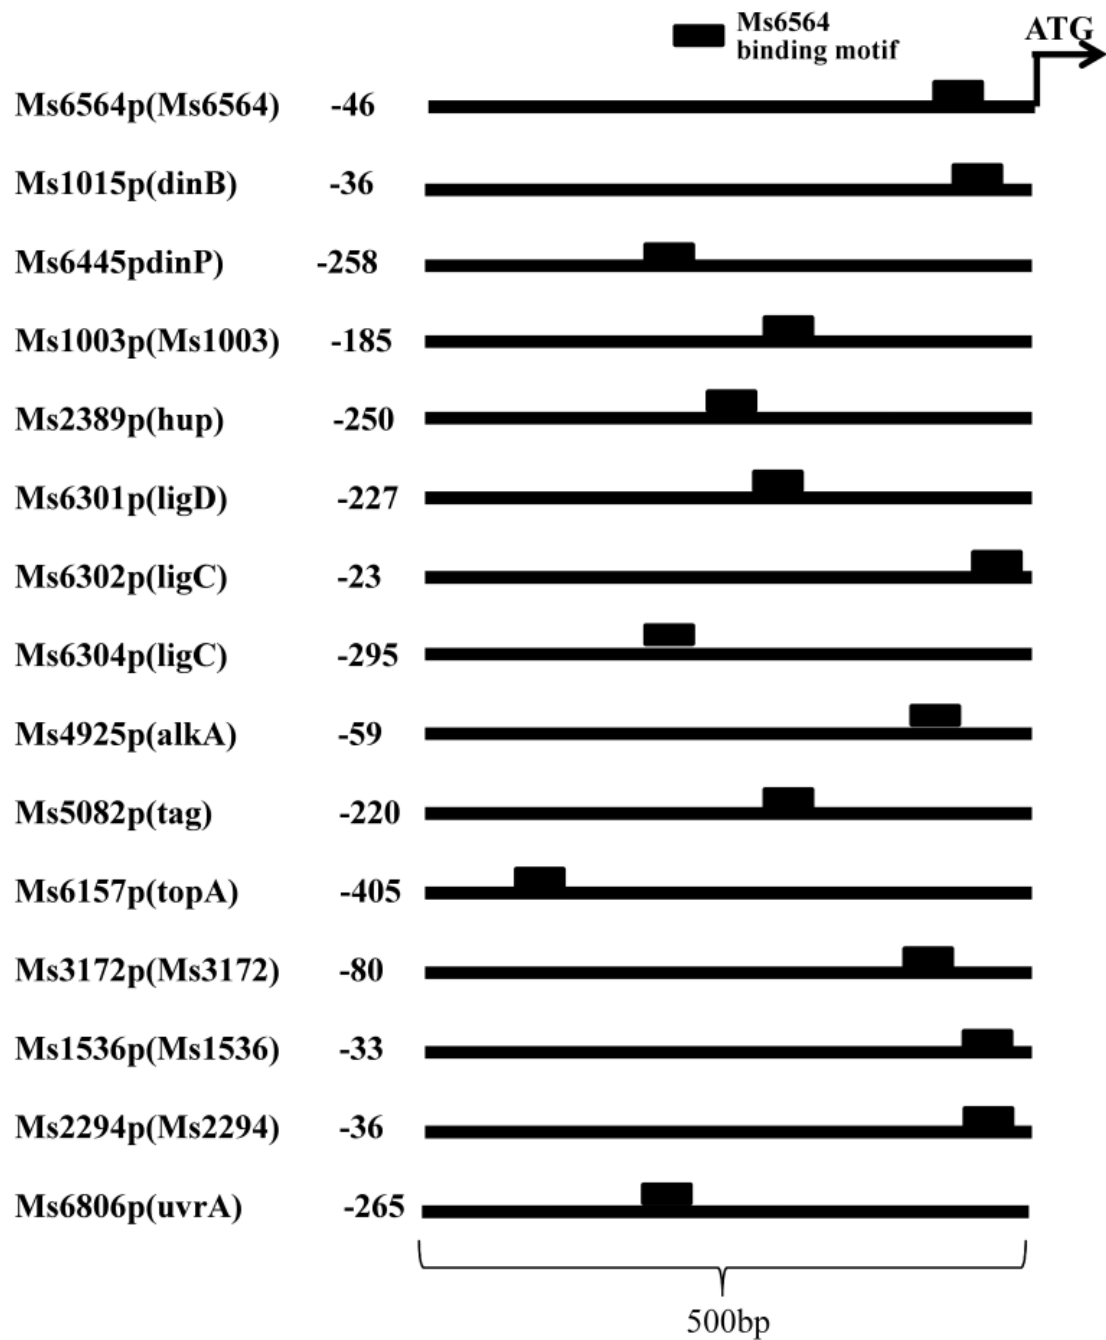

**Fig. S4.** Assays for the locations of binding site for Ms6564 with respect to the promoters of target genes. The distance (bp) to the start code ATG are indicated.

## Supplemental Fig. S5

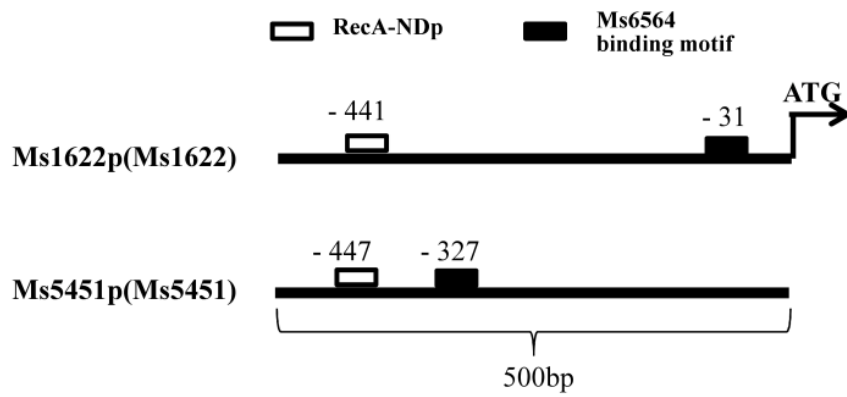

**Fig. S5. Comparative assays for the locations of binding site for Ms6564 and ClpR regulators with respect to the promoters of target genes. The distance (bp) to the start code ATG are indicated on top of the sites.**
